# Supplementary material
Source: MDPI journal article supplement (https://www.mdpi.com/2072-4292/9/2/114)
Supplement: s1 [file s1]

Supplementary Material: Remote Sensing of Glacier Change in the Central Qinghai-Tibet Plateau and the Relationship with Changing Climate

Linghong Ke, Xiaoli Ding, Wenkai Li and Bo Qiu


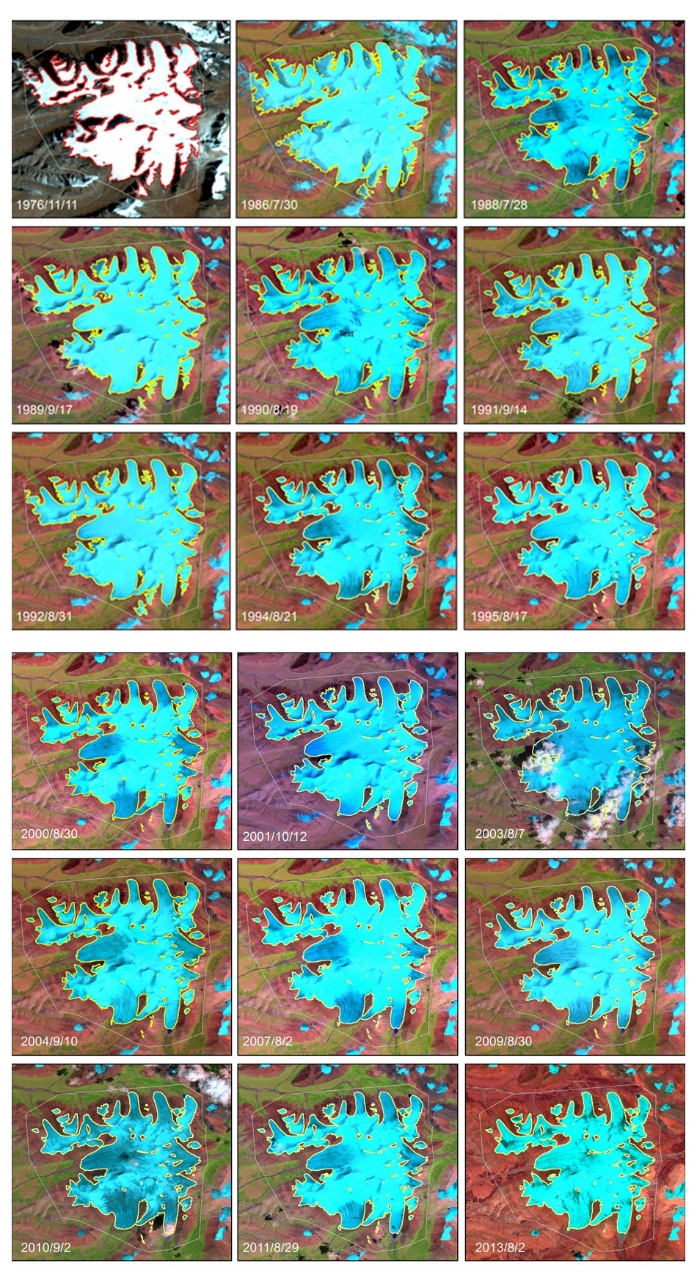


**Figure S1.** Glacier outlines (red or yellow lines) mapped from Landsat MSS/TM/ETM+/OLI images. Date format is in year/month/day. For MSS image (1976) , the base image is natural color map with RGB composite from Band 6, 5, 4; for TM/ETM+ images, the base images are false color map with RGB composite from Band 7, 4, 3; For OLI image (2013), the base image is false color map composite from band 7, 5, 4.


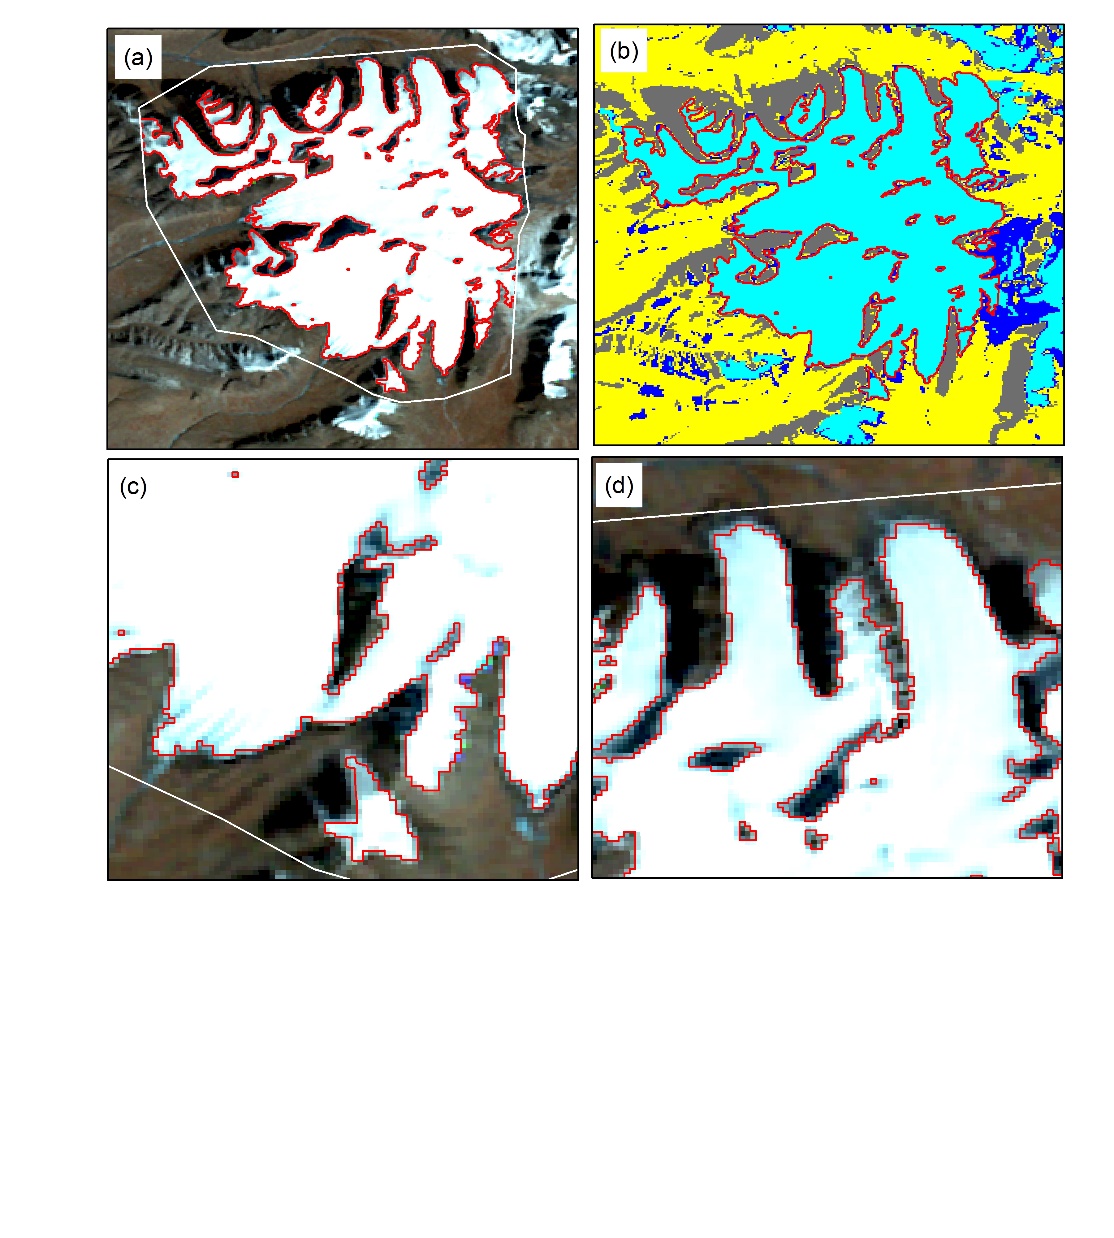


**Figure S2.** Mapping results based on MSS image acquired on 11 November 1976. Glacier outlines in red lines are overlaid on natural color composite of MSS image (R, G, B in band 6, 5, 4) (**a**), and on the ISODATA unsupervised classification result (different color represents different classification type) (**b**). (**c**,**d**) are zoom-in part of (**a**) to illustrate the performance of the semi-automated method.


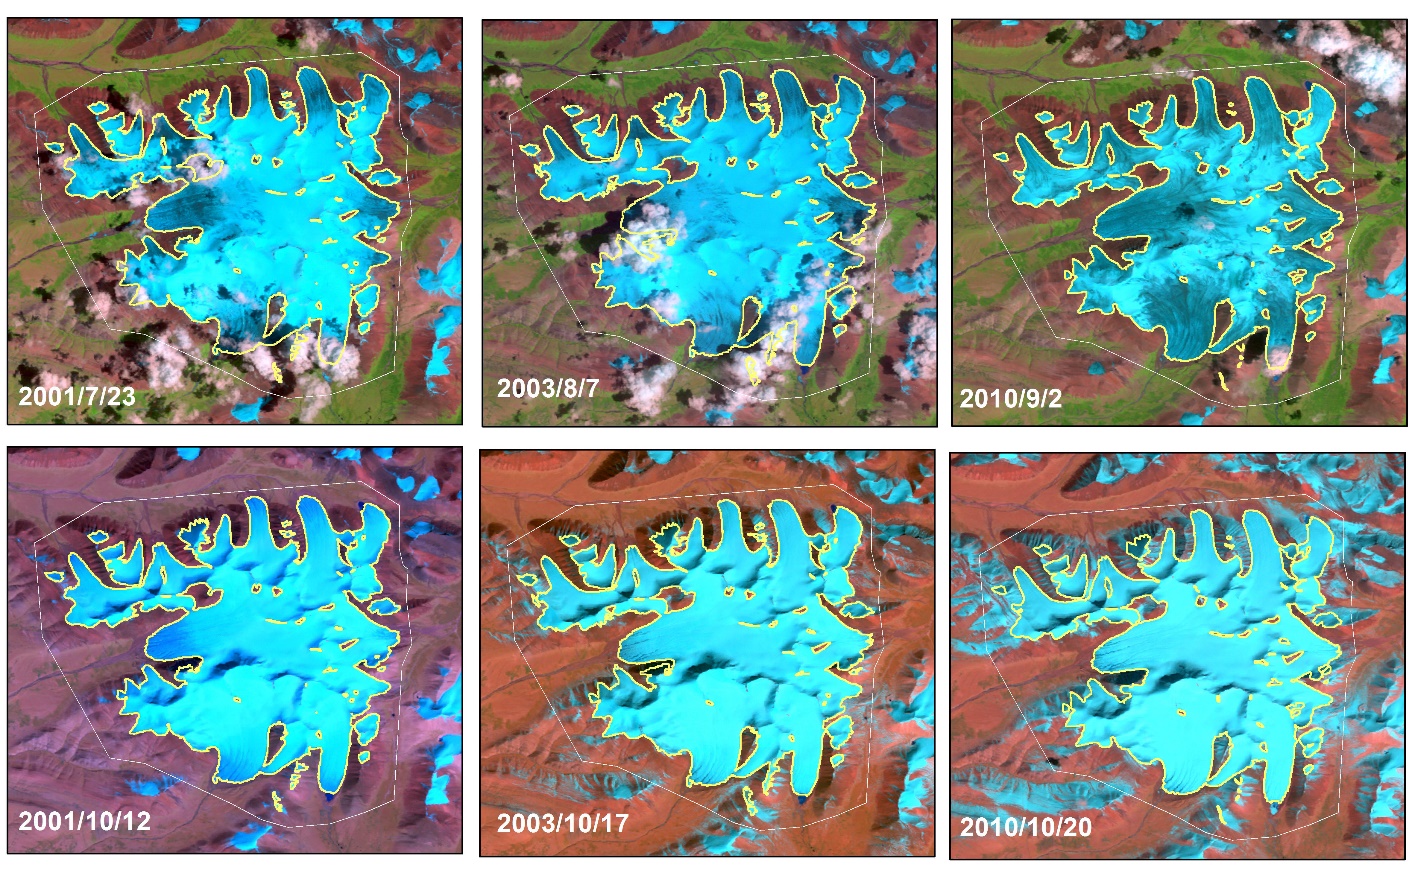


**Figure S3.** Glacier mapping in three years (column 1, 2001; column 2, 2003, column 3, 2010) with reference to clear images (row 2) over the cloud-covered parts. Glacier outlines are shown in yellow lines, superimposed on base maps in false color composite (R, G, B in band 7, 4, 3)

**Figure S4.** Multi-year averaged (1976-2011) monthly temperature (lines) and precipitation (bars) over the DKMD and Tuotuohe based on CN05 gridded climate dataset, in comparison with records derived from the Tuotuohe meteorological station. The station is 143.6 km away from the study glaciers with an elevation about 4533 m. For the Tuotuohe region, data from the CN05 dataset are highly consistent with that recorded at the meteorological station. The intra-annual variation of climatic variables over the DKMD region are similar to that of Tuotuohe region, with relatively higher level of precipitation totals and lower level of temperature due to the higher altitudes.

**Figure S5.** Inter-annual variation of precipitation (**a**) and temperature (**b**) over 1976-2011 for the DKMD region (CN05 gridded dataset), Tuotuohe (CN05 gridded dataset) in comparison with these recorded at the Tuotuohe meteorological station.

© 2017 by the authors; licensee MDPI, Basel, Switzerland. This article is an open access article distributed under the terms and conditions of the Creative Commons Attribution (CC-BY) license (http://creativecommons.org/licenses/by/4.0/).
